## AUDIT-3 AND AUDIT-4: EFFECTIVENESS OF TWO SHORT FORMS OF THE ALCOHOL USE DISORDERS IDENTIFICATION TEST

ANTONI GUAL<sup>1,2\*</sup>, LIDIA SEGURA<sup>1</sup>, MONTSERRAT CONTEL<sup>1</sup>, NICK HEATHER<sup>3</sup> and JOAN COLOM<sup>1</sup>

<sup>1</sup>Health and Social Security Department, Program on Substance Abuse, Autonomous Government of Catalonia, <sup>2</sup>Alcohol Unit, Hospital Clinic, Barcelona, Spain and <sup>3</sup>Centre for Alcohol and Drug Studies, University of Northumbria at Newcastle upon Tyne, UK

(Received 19 September 2001; in revised form 1 February 2002; accepted 27 May 2002)

**Abstract** — **Aims:** To identify suitable short versions of the Alcohol Use Disorders Identification Test (AUDIT) and to evaluate their effectiveness as screening tests for 'risky drinking' among men and women in primary health care (PHC) settings. **Methods:** A total of 255 patients attending five PHC centres in Catalonia (Spain) were interviewed by clinicians regarding health status and drinking pattern. Patients also completed the AUDIT. Clinicians' diagnosis of risky drinking was used as a gold standard to evaluate the effectiveness of three forms of AUDIT. **Results:** AUDIT-3 and AUDIT-4 performed similarly to AUDIT-10 in detecting risky drinking and had equivalent receiver operating characteristics curves and their areas under the curve. **Conclusions:** Both short forms of AUDIT seem to be as effective as the full AUDIT for detecting risky drinking among men and women in PHC settings.

### INTRODUCTION

The social and economic burden due to alcohol consumption in Western countries has become an increasing cause for concern. Most alcohol-related problems appear in non-alcohol-dependent individuals who fall into the categories of hazardous or harmful drinkers according to World Health Organization (2000) terminology.

Concern about those drinking over recommended levels has led to the concept of 'risky drinking' (Higgins-Biddle and Babor, 1996), usually referring to men drinking >280 g (168 g for women) of alcohol per week. Although not defined precisely, the concept of risky drinking is often used to include both hazardous and harmful drinking.

Several studies have shown that drinking above World Health Organization recommendations (Dawson and Archer, 1993; Anderson, 1996; Prada *et al.*, 1996; Portella *et al.*, 1998) raises the risk of alcohol-related physical and psychosocial problems (100% for liver cirrhosis, 20–30% for cancer of the oral cavity, pharynx and larynx, 10% for cancer of the oesophagus, 14% for cancer of the liver, 10–20% for cancer of the female breast and possibly 20% for stroke). Overall, the World Health Organization estimates that, in developed countries, alcohol accounts for 10–11% of all illnesses and deaths each year (Murray and Lopez, 1996). Risky drinking and alcohol misuse or dependence are common in primary health care (PHC) patients. In European countries, the prevalence of risky drinking in PHC settings ranges from 2.1 to 41% among men and from 0.8 to 21% among women (World Health Organization, 2001). This high prevalence of risky drinking has led to the development of screening tools and brief intervention packages (Heather *et al.*, 1987; Gomel *et al.*, 1994; University of Sydney, 1994; National Institute on Alcohol Abuse and Alcoholism, 1995; Òrgan Tècnic de Drogodependències, 1996), which aim to help general practitioners (GPs) and other

health care professionals to identify, assess and advise risky drinkers. The fact that brief interventions have proven efficacy (Wallace *et al.*, 1988; Babor and Grant, 1992; Nuffield Institute for Health, 1993; Altisent *et al.*, 1997; Fernández *et al.*, 1997) and cost-effectiveness (Fleming *et al.*, 2000) clearly increases the need to develop reliable, valid and user-friendly screening tools.

Fiellin *et al.* (2000) concluded in their systematic review that the literature supports screening for lifetime and current misuse or dependence disorders by means of the CAGE questions and, for less severe alcohol problems, such as at-risk, harmful, and hazardous drinking, by means of the Alcohol Use Disorders Identification Test (AUDIT).

The AUDIT (Saunders and Aasland, 1987; Saunders *et al.*, 1993) was developed as part of the World Health Organization Collaborative Project on the Detection and Management of Alcohol-related Problems in Primary Health Care, to identify hazardous and harmful alcohol use. AUDIT is a 10-item questionnaire that enquires about alcohol consumption and frequency of drinking, the presence of alcohol-related problems and alcohol-dependence symptoms. Several studies have shown its validity and reliability in the detection of risky drinking, alcohol misuse and alcohol dependence (Bohn *et al.*, 1995; Martínez, 1996; Piccinelli *et al.*, 1997; Volk *et al.*, 1997; Rubio *et al.*, 1998; ConTEL *et al.*, 1999). Depending on the cut-off and the criterion standards used, studies have reported sensitivities between 51 and 97% and specificities between 78 and 96% (Fiellin *et al.*, 2000).

Seppä *et al.* (1998) developed the Five-Shot Questionnaire for detecting risky drinking, by combining two items from AUDIT asking about drinking amounts and three items from CAGE that correspond to the three different types of question in the AUDIT (hazardous alcohol consumption, dependence symptoms and harmful alcohol consumption). This instrument was tested in a middle-aged male population and, although it performed better than the CAGE, its usefulness among other age groups, among women and in PHC settings has not been demonstrated.

The AUDIT-C (Bush *et al.*, 1998; Aertgeerts *et al.*, 2001; Gordon *et al.*, 2001) includes only the three AUDIT alcohol consumption questions and its performance as a screening test

\*Author to whom correspondence should be addressed at: Health and Social Security Department, Program on Substance Abuse, Autonomous Government of Catalonia, Travessera de les Corts 131–159, Pavelló Ave Maria, 08028 Barcelona, Spain.

has been evaluated in three different studies. Bush *et al.* (1998) evaluated the AUDIT-C for active alcohol misuse or dependence and/or risky drinking in a male population. Although the AUDIT-C performed better than the full AUDIT and the CAGE in identifying risky drinkers, this study was restricted to men, performed at three Veterans Affairs (VA) general medical clinics and the interviews were conducted by telephone. Recent data (Kraus and Augustin, 2001) suggest that telephone interviews can produce a significant bias in results. Gordon *et al.* (2001) used the AUDIT-C to identify hazardous drinkers in a large PHC sample. The AUDIT-C proved to be as effective as the AUDIT, even though criteria for hazardous drinking were not established on the basis of clinical judgement, but using quantity–frequency measures obtained from a self-administered questionnaire. In general, the AUDIT-C has shown a sensitivity of 54 to 98% and a specificity of 57 to 93% for various definitions of heavy drinking (Fiellin *et al.*, 2000).

In Europe, a large study of alcohol screening questionnaires in PHC carried out in Belgium (Aertgeerts *et al.*, 2001) compared the full AUDIT with two shorter forms (Bush *et al.*, 1998; Gordon *et al.*, 2001) and the 5-shot questionnaire (Seppä *et al.*, 1998). The AUDIT-C performed significantly less well than the full AUDIT among female patients, but compared well with other questionnaires. It should also be noted that this study focused on alcohol misuse and dependence, not on 'risky drinking'. Nevertheless, the authors suggested that the simplicity of the AUDIT-C supports its routine use by GPs.

Throughout Phase III of the World Health Organization Collaborative Study (Implementing and Supporting Early Intervention Strategies in Primary Health Care) the opinions of all GPs who participated were collected by means of systematic focus groups. Most GPs complained about the fact that it was too long to be used as a systematic screening tool. They also stated that the alcohol consumption questions (1–3) were well accepted by patients, but questions dealing with alcohol dependence and alcohol-related problems (4–10) tended to arouse defensiveness. These observations, together with the encouraging results previously obtained with short forms of the AUDIT (Piccinelli *et al.*, 1997; Bush *et al.*, 1998; Aertgeerts *et al.*, 2001; Gordon *et al.*, 2001) led us to design the present study, in order to identify suitable short versions of AUDIT and, if appropriate, to test their effectiveness as screening tests for risky drinking among men and women in PHC settings. Also, this study provided an opportunity to examine possible differences between a population with a Mediterranean drinking pattern and other populations previously studied.

## SUBJECTS AND METHODS

### *Subjects*

This study was conducted in five PHC centres in Catalonia, Spain. Data presented here are from a validation study carried out as part of a larger study concerned with screening and brief intervention among risky drinkers in PHC settings. According to the Catalan Health Plan Objectives, patients must be asked about their drinking habits every 2 years as part of the clinical routine; no informed consent was then required. A total of 269 patients of both genders were interviewed, of whom 14 (5.2%) were excluded because of lack of relevant information. No

*a priori* eligibility criteria were used to select the population, and patients were interviewed when attending their PHC setting.

### *Alcohol screening measures*

Before the interview, patients were asked to complete the 10-item AUDIT. GPs interviewed patients about their drinking habits using a Systematic Interview of Alcohol Consumption that included three questions exploring frequency and amount of consumption: 'If you ever drink alcoholic beverages (wine, beer, etc.), how many beverages a day?' (measured in standard drinks); 'How often?' (number of days in a week); and 'On weekends (or workdays) do your drinking habits change?'. Detailed information about normal and exceptional drinking patterns was obtained with this recently validated instrument (Gual *et al.*, 2001). The clinician's diagnosis of risky drinking was used as a gold standard. GPs identified as risky drinkers all patients whose weekly alcohol consumption was above the World Health Organization recommendations (280 g for men and 168 g for women) and/or who fulfilled criteria for hazardous or harmful drinking (World Health Organization, 2000).

### *Statistical analysis*

The Statistical Package for the Social Sciences (SPSS 9.0) was used for data analysis. Logistic regression analysis was carried out to identify those items that minimized the probability of misclassification between subjects with and without risky drinking. Following the Piccinelli *et al.* (1997) study, a stepwise selection of items was adopted by using the likelihood ratio statistic as a test for removal and a *P*-value of 0.10 to remove an item. Cross-tabulations and *t*-tests were used for group comparisons. Relationships between the three forms of AUDIT and reported mean weekly alcohol consumption were examined by regression analysis. Sensitivity, specificity, positive predictive and overall accuracy (OA) values were calculated for the full, 3-item and 4-item AUDIT forms in relation to the gold standard (diagnosis of risky drinking). Receiver operating characteristics (ROC) curves and their areas under the curve (AUROCs) were inspected to choose the optimal screening test and the best cut-off scores according to sensitivity and specificity levels. To compare AUROCs, we used the *Z* statistic defined following the method described by Hanley and McNeil (1983) which takes into account the correlation between the areas that is induced by the paired nature of the data.

## RESULTS

Of the 255 patients included, 127 (49.8%) were men with a mean age ( $\pm$  SD) of  $43.6 \pm 13.1$  years (range: 17–82) and 128 (50.2%) were women with a mean age of  $44.4 \pm 14.4$  years (range: 18–81). Other variables registered were employment status (73% employed, 12% housewives, 6% retired, 2% students and 2% unemployed), Hollingshead Index of Social Position (Hollingshead, 1957) (24% level I, 20% level II, 18% level III and 14% level IV) and educational level (54% had <9 years of school, 23% were high school graduates and 16% were college graduates).

Reported weekly alcohol consumption was translated into Spanish standard drinks (Gual *et al.*, 1999) (one drink = 10 g of pure ethanol). Alcohol consumption in men ranged from 0 to 105 standard drinks and for women from 0 to 32 (Table 1).

AUDIT-10 scores ranged in men from 0 to 34 (mean  $\pm$  SD:  $6.76 \pm 5.64$ ) and in women from 0 to 10 ( $2.75 \pm 1.91$ ).

#### Comparison of AUDIT-10, AUDIT-3 and AUDIT-4

The logistic regression analysis retained five items in the model ( $\chi^2 = 180.18$ ;  $df = 5$ ;  $P < 0.0001$ ) with 80% sensitivity, 96% specificity and 92% overall accuracy (Table 2). The items analysed were the following: item 1 (How often do you have a drink containing alcohol?); item 2 (How many drinks containing alcohol do you have on a typical day when you are drinking?); item 3 (How often do you have 6 or more drinks on one occasion?); item 6 (How often during the past year have you needed a first drink in the morning to get yourself going after a heavy drinking session?) and item 10 (Has a relative or friend or a doctor or other health worker been concerned about your drinking or suggested that you should cut down?). The same analysis was done separately for both genders. Among males, the logistic regression analysis retained the same five items (sensitivity: 89%; specificity: 90%), whereas among females, four items (item 6 dropped out) were retained in the model (sensitivity: 64%; specificity: 100%) (Table 1). These results led us to evaluate two different short forms of the AUDIT by combining those items significantly associated with the clinical diagnosis of risky drinking and which were retained in the model for both genders. Scores for these short forms were extracted from the full AUDIT for each patient. The AUDIT-3 includes the first three questions which assess alcohol consumption (reported as AUDIT-C in the literature), and AUDIT-4 is constructed by adding the 10th item to these three questions.

AUDIT-3 scores ranged from 0 to 12 (mean  $\pm$  SD  $3.58 \pm 2.44$ ) and AUDIT-4 from 0 to 16 ( $4.24 \pm 3.31$ ). Scores on AUDIT-10 ( $r = 0.83$ ,  $n = 255$ ,  $P < 0.001$ ), AUDIT-3 ( $r = 0.84$ ,  $n = 255$ ,  $P < 0.001$ ) and AUDIT-4 ( $r = 0.830$ ,  $n = 255$ ,  $P < 0.001$ ) were strongly correlated with alcohol consumption per week.

According to clinician diagnosis, 41.7% of men and 8.6% of women were classified as risky drinkers. According to the

AUDIT cut-off scores established in its Spanish validation ( $\geq 9$  for men and  $\geq 6$  for women), 31.5% of men and 6.3% of women were classified as risky drinkers.

ROC curves comparing the three AUDIT forms with the gold standard are presented with their AUROCs and 95% confidence intervals for men and women in Figs 1 and 2. Sensitivities and specificities at different cut-off scores are detailed for both genders in Table 3. Among men, AUROCs (Fig. 1) were 0.913 for AUDIT-3, 0.924 for AUDIT-4 and 0.920 for AUDIT-10 and no significant differences were found in comparisons among them (AUDIT-3 vs AUDIT-10,  $P = 0.646$ ; AUDIT-4 vs AUDIT-10,  $P = 0.751$ ). When comparing all AUROCs (0.957, 0.945 and 0.871 respectively) among women (Fig. 2), no significant differences were found (AUDIT-3 vs AUDIT-10,  $P = 0.889$ ; AUDIT-4 vs AUDIT-10,  $P = 0.90$ ).

Among men, the best cut-off scores were 7 for the full AUDIT (sensitivity 86.8%; specificity 81.1%) and AUDIT-4 (sensitivity 83.0%; specificity 89.1%), and 5 for AUDIT-3 (sensitivity 92.4%; specificity 74.3%). Sensitivity levels at each cut-off were higher for the full AUDIT, but specificity levels were higher for AUDIT-4. Among women, the best cut-off scores were 5 for the full AUDIT and AUDIT-4 with equal sensitivity and specificity levels (sensitivity 72.7%; specificity 95.73%), and 4 for AUDIT-3 (90.9 and 68.4% respectively). Sensitivity and specificity levels at each cut-off were higher for the full AUDIT and AUDIT-4 than for AUDIT-3.

Risky drinker prevalences according to the best cut-off scores for AUDIT-3, -4 and -10 are also presented in Table 4.

## DISCUSSION

In the Spanish context, the AUDIT questionnaire has been widely used by physicians in conjunction with the World Health Organization Phase III Collaborative Study on alcohol and PHC. As noted above, these doctors complained about its length and an increase in patients' defensiveness when

Table 1. Median weekly alcohol consumption among men and women (measured in standard drinks) according to the gold standard classification

| Drinking pattern               | Standard drinks     |                    |                       |                    |
|--------------------------------|---------------------|--------------------|-----------------------|--------------------|
|                                | Males ( $n = 127$ ) |                    | Females ( $n = 128$ ) |                    |
|                                | Risky drinkers      | Non-risky drinkers | Risky drinkers        | Non-risky drinkers |
| Alcohol consumption per week** | 35                  | 8                  | 23                    | 4                  |
| On week days                   | 25                  | 5                  | 20                    | 0                  |
| On weekend days                | 12                  | 4                  | 4                     | 2                  |

\*\*  $t = 8.34$ ,  $df = 253$ ;  $P < 0.001$ .

Table 2. Items retained in the model

| AUDIT item | B      | SE     | Wald   | Df | P     | R      | Exp (B) | 95% CI Exp (B) |
|------------|--------|--------|--------|----|-------|--------|---------|----------------|
| 1          | -0.941 | 0.370  | 6.462  | 1  | 0.011 | -0.125 | 0.390   | 0.188-0.806    |
| 2          | -2.309 | 0.496  | 21.669 | 1  | 0.000 | -0.260 | 0.099   | 0.037-0.262    |
| 3          | -0.729 | 0.333  | 4.789  | 1  | 0.029 | -0.098 | 0.482   | 0.251-0.926    |
| 6          | -6.791 | 25.402 | 0.072  | 1  | 0.789 | 0.000  | 0.001   | 0.000-0.002    |
| 10         | -0.611 | 0.191  | 10.268 | 1  | 0.001 | -0.169 | 0.542   | 0.373-0.788    |

SE, standard error; Df, degrees of freedom; CI, confidence interval; B, slope coefficient; R, lineal association measure; Exp (B), logit coefficient.

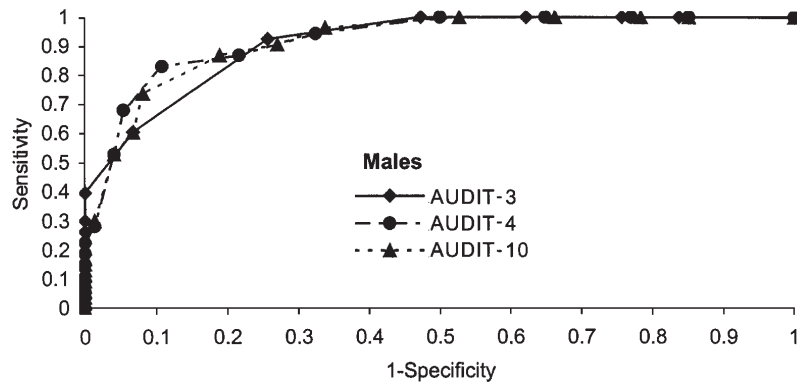

Fig. 1. Receiver operating characteristics curves of the three forms of AUDIT among males.

No differences in areas under the curves were found between: AUDIT-3 vs AUDIT-4 ( $P = 0.412$ ); AUDIT-3 vs AUDIT-10 ( $P = 0.646$ ); and AUDIT-4 vs AUDIT-10 ( $P = 0.751$ ).

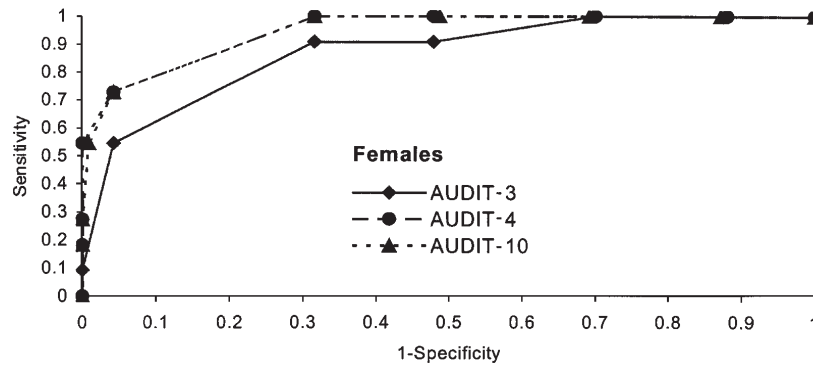

Fig. 2. Receiver operating characteristics curves of the three forms of AUDIT among females.

No differences among areas under the curves were found between: AUDIT-3 vs AUDIT-4 ( $P = 0.887$ ); AUDIT-3 vs AUDIT-10 ( $P = 0.889$ ); and AUDIT-4 vs AUDIT-10 ( $P = 0.903$ ).

Table 3. Performance of three AUDIT forms compared with clinical diagnosis of risky drinking

| Gender   | Version  | Cut-off  | Sensitivity | Specificity | Positive predictive value | Overall accuracy |
|----------|----------|----------|-------------|-------------|---------------------------|------------------|
| Males    | AUDIT-3  | $\geq 4$ | 1.00        | 0.53        | 0.60                      | 0.72             |
|          |          | $\geq 5$ | 0.92        | 0.74        | 0.72                      | 0.82             |
|          | AUDIT-4  | $\geq 6$ | 0.60        | 0.93        | 0.86                      | 0.79             |
|          |          | $\geq 6$ | 0.87        | 0.78        | 0.74                      | 0.82             |
|          |          | $\geq 7$ | 0.83        | 0.89        | 0.85                      | 0.87             |
|          | AUDIT-10 | $\geq 8$ | 0.68        | 0.94        | 0.90                      | 0.83             |
|          |          | $\geq 6$ | 0.91        | 0.73        | 0.71                      | 0.80             |
|          |          | $\geq 7$ | 0.87        | 0.81        | 0.77                      | 0.83             |
|          | Females  | AUDIT-3  | $\geq 8$    | 0.73        | 0.92                      | 0.87             |
| $\geq 3$ |          |          | 0.91        | 0.52        | 0.15                      | 0.55             |
| $\geq 4$ |          |          | 0.91        | 0.68        | 0.21                      | 0.70             |
| AUDIT-4  |          | $\geq 5$ | 0.54        | 0.96        | 0.54                      | 0.92             |
|          |          | $\geq 4$ | 1.00        | 0.68        | 0.23                      | 0.71             |
|          |          | $\geq 5$ | 0.73        | 0.96        | 0.61                      | 0.94             |
| AUDIT-10 |          | $\geq 6$ | 0.54        | 1.00        | 1.00                      | 0.96             |
|          |          | $\geq 4$ | 1.00        | 0.68        | 0.23                      | 0.71             |
|          |          | $\geq 5$ | 0.73        | 0.96        | 0.61                      | 0.94             |
|          |          | $\geq 6$ | 0.54        | 0.99        | 0.86                      | 0.95             |



Table 4. Prevalences of risky and non-risky drinkers according to the best cut-off scores in all AUDIT forms and among gender

| AUDIT form | Males (n = 127)        |                            | Females (n = 128)      |                            |
|------------|------------------------|----------------------------|------------------------|----------------------------|
|            | Risky drinker<br>n (%) | Non-risky drinker<br>n (%) | Risky drinker<br>n (%) | Non-risky drinker<br>n (%) |
| AUDIT-3    | 53.5                   | 46.5                       | 36.7                   | 63.3                       |
| AUDIT-4    | 40.9                   | 59.1                       | 10.2                   | 89.8                       |
| AUDIT-10*  | 47.2                   | 25.8                       | 10.2                   | 89.8                       |

\* $t = 7.62$ ;  $df = 253$ ;  $P < 0.001$ .

answering questions 4–10 dealing with alcohol dependence and alcohol-related problems. Their concern led us to carry out the present study, trying to find suitable short forms of AUDIT and to describe their screening properties.

As a comparison standard, we used the clinical diagnosis of risky drinking made by study physicians after interviewing patients attending the PHC centre. Clinicians made 10% more risky drinking diagnoses among men (~2% more among women) than those made by AUDIT on the basis of Spanish cut-off scores established in previous validation studies (Rubio *et al.*, 1998; Contel *et al.*, 1999). Furthermore, The National Household Survey implemented in Spain in 1999 (Dirección General para el Plan Nacional de Drogas, 2001) showed a heavy drinking prevalence of ~9.5% (12.1% for males and 6.9% for females). This difference may be explained by the fact that the criterion standard used in our study was more rigorous and included criteria for hazardous and harmful drinking. The study clinicians had also been deeply trained in screening and brief intervention strategies in conjunction with the Drink-Less Program. In addition, the percentages found in our study (Table 4) are higher than those of harmful and hazardous drinking (from 1 to 13%) obtained in previous studies. These discrepancies may be explained by the variation in risky alcohol consumption levels established. Since alcohol consumption in women has been increasing in Mediterranean countries (Dirección General para el Plan Nacional de Drogas, 2001), the low prevalence obtained in females should be a cause of concern. This phenomenon may be explained partly by the tendency to hide alcohol consumption, which has been recorded as higher in females.

Correlations between the scores of the three AUDIT forms and alcohol consumption (in standard drinks) were positive and highly significant. The three AUDIT forms performed similarly and had equivalent AUROCs for detecting risky drinking among men and women attending PHC centres. No statistically significant differences were found when comparing the three AUROCs in either gender. Both short screening forms showed acceptable sensitivity and specificity levels for the detection of risky drinkers.

Although the standard criteria applied, the population screened and settings have varied in all studies previously published, the present results are partially in agreement with those studies (Bush *et al.*, 1998; Aertgeerts *et al.*, 2001; Gordon *et al.*, 2001). The AUDIT cut-off scores which emerged in our study were higher ( $\geq 7$  among males,  $\geq 5$  among females) than those previously proposed ( $\geq 5$  among males and females), but were still lower than those recommended in the validation studies ( $\geq 9$  among males,  $\geq 6$  among females).

For the shorter forms of AUDIT, the cut-off scores were similarly reduced.

The results for male patients found with the AUDIT-3 (or AUDIT-C), including the cut-off point ( $\geq 5$ ), fit well with previous studies. For female patients, AUDIT-4 performed exactly as the full AUDIT at the same cut-off points. The results reported here have led us to recommend that clinicians use the AUDIT-3 questionnaire in general health screening interventions. If a score of  $\geq 5$  among men and  $\geq 4$  among women is observed, a more in-depth assessment of drinking pattern and alcohol-related problems should be carried out. If including question 10 increases the total score to 7 among men and 5 among women, this should definitely lead to a diagnosis of risky drinking. More detailed questioning, including the full AUDIT if necessary, could be used to make decisions about the need for referral to specialist help for alcohol dependence. Screening devices, such as the AUDIT in all of its self-administered forms, facilitate the GP's daily work, and, as our results confirm, are as reliable as a systematic GPs interview on alcohol consumption.

*Acknowledgements* — We thank the following primary care physicians for collaborating: N. Bastida, I. Pie, J. M. Segura, E. Esquerro, P. Edo, M. Pallarés and R. Català.

## REFERENCES

- Aertgeerts, B., Buntinx, F., Sansoms, S. and Fevery, J. (2001) Screening properties of questionnaires and laboratory tests for the detection of alcohol abuse or dependence in a general practice population. *British Journal of General Practice* **51**, 206–217.
- Altisent, R., Córdoba, R., Delgado, M. T., Pico, M. V., Melus, E., Aranguren, F., Alvira, U., Barberá, C., Moran, J. and Reixa, S. (1997) Estudio multicéntrico sobre la eficacia del consejo para la prevención del alcoholismo en atención primaria (EMPA). *Medicina Clínica* **109**, 121–124.
- Anderson, P. (1996) *Alcohol and Primary Health Care*. World Health Organization Regional Office, Copenhagen.
- Babor, T. F. and Grant, M. (1992) WHO Collaborating investigators project on identification and management of alcohol-related problems. Combined analyses of outcome data: the cross-national generalizability of brief interventions. Report on phase II: a randomized clinical trial of brief interventions in primary health care. World Health Organization Regional Office, Copenhagen.
- Bohn, M. J., Babor, T. F. and Kranzler, H. R. (1995) The Alcohol Use Disorders Identification Test (AUDIT): validation of a screening instrument for use in medical settings. *Journal of Studies on Alcohol* **56**, 423–432.
- Bush, K., Kivlahan, D. R., McDonnell, M. S., Fihn, S. D. and Bradley, K. A. (1998) The AUDIT Alcohol Consumption Questions (AUDIT-C): an effective brief screening test for problem drinking. *Archives of Internal Medicine* **158**, 1789–1795.
- Contel, M., Gual, A. and Colom, J. (1999) Test para la identificación de trastornos por uso de alcohol (AUDIT): traducción y validación del AUDIT al catalán y castellano. *Adicciones* **11**, 337–347.
- Dawson, D. A. and Archer, L. D. (1993) Relative frequency of heavy drinking and the risk of alcohol dependence. *Addiction* **88**, 1509–1518.
- Dirección General para el Plan Nacional de Drogas (DGPND) (2001) *Informe nº 4-Marzo del 2001 del Observatorio Español sobre Drogas*. Ministerio del Interior, Spain.
- Fernández, M. I., Bermejo, C. J., Alonso, M., Herreros, B., Nieto, M., Novoa, A. and Marcelo, M. T. (1997) Efectividad del consejo médico breve para reducir el consumo de alcohol en bebedores. *Atención Primaria* **19**, 127–132.
- Fiellin, D. A., Reid, M. C. and O'Connor, P. G. (2000) Screening for alcohol problems in primary care: a systematic review. *Archives of Internal Medicine* **160**, 1977–1989.

- Fleming, M. F., Mundt, M. P., French, M. T., Manwell, L. B., Stauffacher, E. A. and Barry, K. L. (2000) Benefit-cost analysis of brief physician advice with problem drinkers in primary care settings. *Medical Care* **38**, 7–18.
- Gomel, M. K., Saunders, J. B., Burns, L., Hardcastle, D. M. and Sumich, M. (1994) Dissemination of early intervention for harmful alcohol consumption in general practice. *Health Promotion Journal of Australia* **4**, 65–69.
- Gordon, A. J., Maisto, S. A., McNeil, M., Kraemer, K. L., Conigliaro, R. L., Kelley, M. E. and Conigliaro, J. (2001) Three questions can detect hazardous drinkers. *Journal of Family Practice* **50**, 313–320.
- Gual, A., Martos, A. R., Lligona, A. and Llopis, J. J. (1999) Does the concept of a standard drink apply to viticultural societies? *Alcohol and Alcoholism*, **34**, 153–60.
- Gual, A., Segura, L., Contel, M. and Colom, J. (2001) The ISCA (Systematic Interview of Alcohol Consumption), a new instrument to detect risky drinking. *Medicina Clínica (Barcelona)* **117**, 685–689.
- Hanley, J. A. and McNeil, B. J. (1983) A method of comparing the areas under receiver operating characteristic curves derived from the same cases. *Radiology* **148**, 839–843.
- Heather, N., Campion, P. D., Neville, R. G. and Maccabe, D. (1987) Evaluation of a controlled drinking minimal intervention for problem drinkers in general practice (The DRAMS scheme). *Journal of the Royal College of General Practitioners* **37**, 358–363.
- Higgins-Biddle, J. C. and Babor, T. F. (1996) Reducing Risky Drinking: A Report on Early Identification and Management of Alcohol Problems Through Screening and Brief Intervention. (Report to Robert Wood Johnson Foundation.) Alcohol Research Center, University of Connecticut Health, Farmington, CT.
- Hollingshead, A. (1957) *Two-factor Index of Social Position*. New Haven, CT.
- Kraus, L. and Augustin, R. (2001) Measuring alcohol consumption and alcohol-related problems: comparison of responses from self-administered questionnaires and telephone interviews. *Addiction*, **96** 459–471.
- Martínez, J. M. (1996) Validación de los cuestionarios breves: AUDIT, CAGE y CBA para la detección precoz del síndrome de dependencia de alcohol en Atención Primaria. Tesis Doctoral, Departamento de Neurociencias, Universidad de Cadiz.
- Murray, C. M. and Lopez, A. (1996) *The Global Burden of Disease: A Comprehensive Assessment of Mortality and Disability from Diseases, Injuries, and Risk Factors in 1990 and Projected to 2020*. World Health Organization, Geneva.
- National Institute on Alcohol Abuse and Alcoholism (1995) *Screening and Brief Intervention Package*. NIAAA, Rockville, MD.
- Nuffield Institute for Health (1993) Brief interventions and alcohol use. *Effective Health Care Bulletin* **7**, 1–14.
- Òrgan Tècnic de Drogodependències (1996) *Dossier Beveu Menys*. Departament de Sanitat i Seguretat Social, Barcelona.
- Piccinelli, M., Tessari, E., Bortolomasi, M., Piasere, O., Semenzin, M., Garzotto, N. and Tansella, M. (1997) Efficacy of the Alcohol Use Disorders Identification Test as a screening tool for hazardous alcohol intake and related disorders in primary care: a validity study. *British Medical Journal* **314**, 420–424.
- Portella, E., Ridao, M., Carrillo, E., Ribas, E., Ribó, C. and Salvat, M. (1998) *El alcohol y su abuso: impacto socioeconómico*. Ed. Médica Panamericana, Madrid.
- Prada, C., Del Río, M. C., Yañez, J. L. and Alvarez, F. J. (1996) Mortalidad relacionada con el consumo de alcohol. *Gaceta Sanitaria* **10**, 161–168.
- Rubio, G., Bermejo, J., Caballero, M. C. and Santo-Domingo, J. (1998) Validación de la Prueba para la Identificación de Transtornos por Uso de Alcohol (AUDIT) en Atención Primaria. *Revista Clínica Española* **198**, 11–14.
- Saunders, J. B. and Aasland, O. G. (1987) WHO Collaborative Project on the identification and treatment of persons with harmful alcohol consumption. Report on phase I: development of a screening instrument. World Health Organization, Geneva.
- Saunders, J. B., Aasland, O. G., Babor, T. F., de la Fuente, J. R. and Grant, M. (1993) Development of the Alcohol Use Disorders Identification Test (AUDIT): WHO Collaborative Project on Early Detection of Persons with Harmful Alcohol Consumption — II. *Addiction* **88**, 791–804.
- Seppä, K., Lepistö, J. and Sillanaukee, P. (1998) Five-shot questionnaire on heavy drinking. *Alcoholism: Clinical and Experimental Research* **22**, 1788–1791.
- University of Sydney (1994) *Drink-less*. University of Sydney, Sydney, NSW.
- Volk, R. J., Steinbauer, J. R., Cantor, S. B. and Holzer, C. E. (1997) The Alcohol Use Disorders Identification Test (AUDIT) as a screen for at-risk drinking in primary care patients of different racial/ethnic backgrounds. *Addiction* **92**, 197–206.
- Wallace, P., Cutler, S. and Haines, A. (1988) Randomized controlled trial of general practitioner intervention in patients with excessive alcohol consumption. *British Medical Journal* **297**, 663–668.
- World Health Organization (2000) *International Guide for Monitoring Alcohol Consumption and Related Harm*. Department of Mental Health and Substance Dependence. World Health Organization, Geneva.
- World Health Organization (2001) *Alcohol in the European Region — Consumption, Harm and Policies*. World Health Organization Regional Office, Copenhagen.
